# Supplementary material for: A chiral sodium lanthanum sulfate for second-order nonlinear optics and proton conduction
Source: Royal Society of Chemistry journal article supplement (doi:10.1039/d4qi01708k), 2024-01-01
Supplement: d4qi01708k1.pdf [file d4qi01708k1.pdf]

## Supporting Information

### A Chiral Sodium Lanthanum Sulfate for Second-Order Nonlinear Optics and Proton Conduction

*Hao Fu,<sup>a,b</sup> Xiaohui Zhang,<sup>a</sup> Peiyu Liu,<sup>a</sup> Bo Li,<sup>c</sup> Baolin Wu,<sup>d</sup> Ye Tao,<sup>a</sup> Qianshuang Lu,<sup>a</sup> Yingjie Li,<sup>a</sup> Jiayi Huang,<sup>a</sup> Fangfang Zhang,<sup>e</sup> Tingchao He,<sup>f</sup> Zhi Chen,<sup>a</sup> Heng Wang,<sup>g</sup> Chenliang Su,<sup>b</sup> Hong-Ying Zang,<sup>c</sup> Xiujun Yu<sup>\*a</sup> and Xiaopeng Li<sup>a,g,h</sup>*

<sup>a</sup>College of Chemistry and Environmental Engineering, Shenzhen University, Shenzhen, Guangdong 518060, China

<sup>b</sup>Institute of Microscale Optoelectronics, Shenzhen University, Shenzhen, Guangdong 518060, China

<sup>c</sup>Key Laboratory of Polyoxometalate Science, Department of Chemistry, Northeast Normal University, Changchun, Jilin 130024, China

<sup>d</sup>Fundamental electrochemistry (IET-1), Institute of Energy Technologies, Forschungszentrum Jülich GmbH, Wilhelm-Johnen-Straße, Jülich 52425, Germany

<sup>e</sup>Research Center for Crystal Materials, Xinjiang Technical Institute of Physics and Chemistry, Chinese Academy of Sciences, Urumqi, Xinjiang 830011, China

<sup>f</sup>Key Laboratory of Optoelectronic Devices and Systems of Ministry of Education and Guangdong Province, College of Physics and Optoelectronic Engineering, Shenzhen University, Shenzhen, Guangdong 518060, China

<sup>g</sup>State Key Laboratory of Organometallic Chemistry, Shanghai Institute of Organic Chemistry, University of Chinese Academy of Sciences, Chinese Academy of Sciences, Shanghai 200032, China

<sup>h</sup>Shenzhen University General Hospital, Shenzhen University Clinical Medical Academy, Shenzhen University, Shenzhen, Guangdong 518055, China

\*Corresponding Authors: xiujunyu@szu.edu.cn (X. Y.)

## **Table of Contents**

- 1. Experimental Section (on page S2-S3)**
- 2. Supporting Figures and Tables (on page S4-S11)**
- 3. References (on page S12)**

## 1. Experimental Section

### Materials and Instrumentation

Commercially available reagents were purchased from Macklin and used without further purification. Fourier transform infrared spectroscopy (FT-IR) data were collected on a Vertex70V Bruker FT-IR Spectrometer. UV/Vis-NIR spectra were recorded on a Shimadzu UV3600i spectrophotometer. Powder X-ray diffraction (PXRD) were measured on a Burker D8 diffractometer using Cu K $\alpha$  radiation ( $\lambda = 1.54056\text{\AA}$ ) under ambient conditions. ICP-OES analyses were performed on a PerkinElmer Avio 200. Thermogravimetric analyses (TGA) were carried out on a Mettler Toledo TGA/SDTA 851e analyzer in **air** atmosphere with a heating rate of 10 °C/min from 30 °C to 1000 °C.

### Crystallographic Study

Single crystal X-ray diffraction data of NaLa(SO<sub>4</sub>)<sub>2</sub>(H<sub>2</sub>O) were collected on a Burker D8 Venture diffractometer with graphite-monochromatic Mo K $\alpha$  radiation ( $\lambda = 0.7103\text{ \AA}$ ). Structure solutions and refinements were done with the OLEX2 software.<sup>1</sup>

### Computational Methods

Crystal structure of NaLa(SO<sub>4</sub>)<sub>2</sub>(H<sub>2</sub>O) was used for theoretical calculations. Electronic structures and optical properties were calculated using a plane-wave basis set and pseudopotentials within density functional theory (DFT) implemented in the total energy code CASTEP.<sup>2</sup> For the exchange and correlation functional, we chose Perdew–Burke–Ernzerhof (PBE) in the generalized gradient approximation (GGA).<sup>3</sup> The interactions between the ionic cores and the electrons were described by the norm-conserving pseudopotential. Following valence-electron configurations were considered in the computation: Na 3s<sup>1</sup>2p<sup>5</sup>, La 5p<sup>6</sup>5d<sup>1</sup>6s<sup>2</sup>, S 3s<sup>2</sup>3p<sup>5</sup>, O 2s<sup>2</sup>2p<sup>4</sup> and H 1s<sup>1</sup>. The numbers of plane waves included in the basis sets were determined by a kinetic-energy cutoff of 800 eV. Monkhorst–Pack k-point sampling of 4 × 4 × 2 was used to perform

numerical integration of the Brillouin zone for  $\text{NaLa}(\text{SO}_4)_2(\text{H}_2\text{O})$ . The Fermi level was set to zero as the energy reference.

### **Synthesis of $\text{NaLa}(\text{SO}_4)_2(\text{H}_2\text{O})$**

The compound  $\text{NaLa}(\text{SO}_4)_2(\text{H}_2\text{O})$  was synthesized through a complementary strategy involving the combination of  $\text{Na}^+$  and  $\text{La}^{3+}$ . Specifically, lanthanum sulfate (0.283 g, 0.5 mmol) and sodium sulfate (0.426 g, 3.0 mmol), were mixed at room temperature, and then  $\text{H}_2\text{O}$  (5 ml) was added. The resultant solution was heated at 200 °C for 3 days. After cooling to room temperature, colourless crystals of  $\text{NaLa}(\text{SO}_4)_2(\text{H}_2\text{O})$  were obtained. Yield: 120 mg (64%, based on lanthanum sulfate). ICP-OES Anal. Calcd for  $\text{NaLa}(\text{SO}_4)_2(\text{H}_2\text{O})$ : La, 37.34; Na, 6.18. Found: La, 36.29; Na, 6.35. Notably, this synthetic protocol demonstrates robustness across a wide range of temperatures (120-200 °C), concentrations and pH levels.

### **NLO Performance Measurements**

NLO properties of  $\text{NaLa}(\text{SO}_4)_2(\text{H}_2\text{O})$  were examined with a home-built scanning microscope with a femtosecond pump in reflection geometry, with the incidence and detection angles both at 45° (Fig. S7).<sup>4</sup> Linearly polarized pump was tuned with the  $\lambda/2$  plate. Second-order NLO susceptibility of  $\text{NaLa}(\text{SO}_4)_2(\text{H}_2\text{O})$  was determined by using a Y-cut quartz as the reference. The effective second-order NLO coefficient,  $d_{\text{eff}}$ , of  $\text{NaLa}(\text{SO}_4)_2(\text{H}_2\text{O})$  was determined using a previous method.<sup>5</sup>

### **Proton Conductivity Measurements**

Proton conductivity of  $\text{NaLa}(\text{SO}_4)_2(\text{H}_2\text{O})$  was measured using an impedance/gain-phase analyzer (Solartron SI 1260) with a quasi-four-probe method over a frequency range from 1 Hz to 1 MHz within the input voltage of 100 mV. The measurements were operated at 30 °C with different relative humidity (50-98%) and under 98% relative humidity with various temperatures (30-85 °C). The impedances at each temperature were tested after equilibration for 30 min. Proton conductivities were calculated using our previous methods.<sup>6,7</sup>

## 2. Supporting Figures and Tables

**Table S1** Crystallographic data of NaLa(SO<sub>4</sub>)<sub>2</sub>(H<sub>2</sub>O).

| Compound                                                           | NaLa(SO <sub>4</sub> ) <sub>2</sub> (H <sub>2</sub> O) |
|--------------------------------------------------------------------|--------------------------------------------------------|
| Chemical Formula                                                   | H <sub>2</sub> LaNaO <sub>9</sub> S <sub>2</sub>       |
| Formula Mass                                                       | 372.04                                                 |
| Crystal System                                                     | trigonal                                               |
| <i>a</i> /Å                                                        | 7.060(4)                                               |
| <i>b</i> /Å                                                        | 7.060(4)                                               |
| <i>c</i> /Å                                                        | 12.953(8)                                              |
| <i>α</i> /°                                                        | 90                                                     |
| <i>β</i> /°                                                        | 90                                                     |
| <i>γ</i> /°                                                        | 120                                                    |
| Volume/ Å <sup>3</sup>                                             | 559.1(7)                                               |
| <i>ρ</i> <sub>calc</sub> /cm <sup>3</sup>                          | 3.315                                                  |
| <i>μ</i> /mm <sup>-1</sup>                                         | 6.371                                                  |
| Temperature/K                                                      | 293.0                                                  |
| Space Group                                                        | <i>P</i> 3 <sub>2</sub> 21                             |
| <i>Z</i>                                                           | 3                                                      |
| No. of Reflections Measured                                        | 8223                                                   |
| No. of Independent Reflections                                     | 725                                                    |
| <i>R</i> <sub>int</sub>                                            | 0.0912                                                 |
| Final <i>R</i> <sub>1</sub> Values<br>( <i>I</i> > 2σ( <i>I</i> )) | 0.0254                                                 |
| Final <i>wR</i> <sub>2</sub> Values ( <i>I</i> > 2σ( <i>I</i> ))   | 0.0505                                                 |
| Goodness of Fit on <i>F</i> <sup>2</sup>                           | 1.092                                                  |
| Flack parameter                                                    | 0.00(4)                                                |
| CCDC Number                                                        | 2351005                                                |

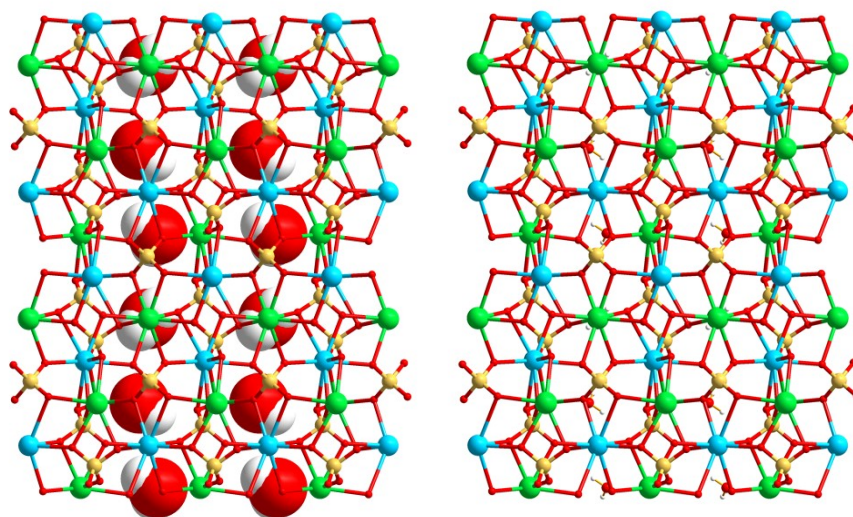

**Fig. S1** View of  $\text{NaLa}(\text{SO}_4)_2(\text{H}_2\text{O})$  framework along the  $a$  or  $b$  axis.

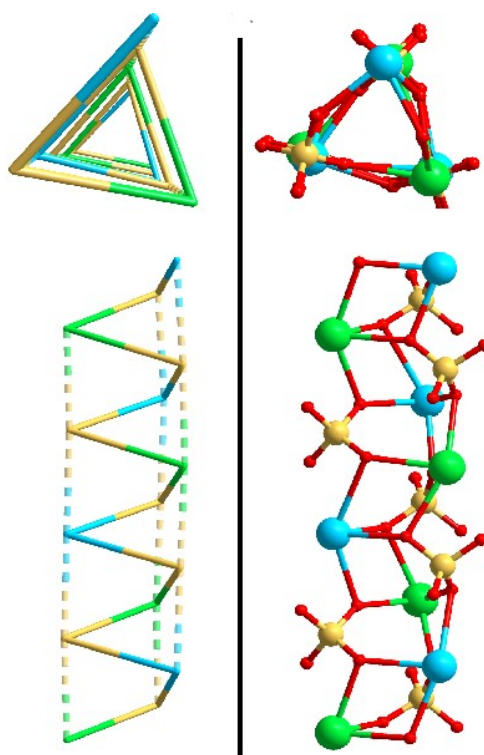

**Fig. S2** 1D triangular prism  $[\text{NaLa}(\text{SO}_4)_2]_\infty$  and simplified topology of spiral chain of -La-S-Na-S-.

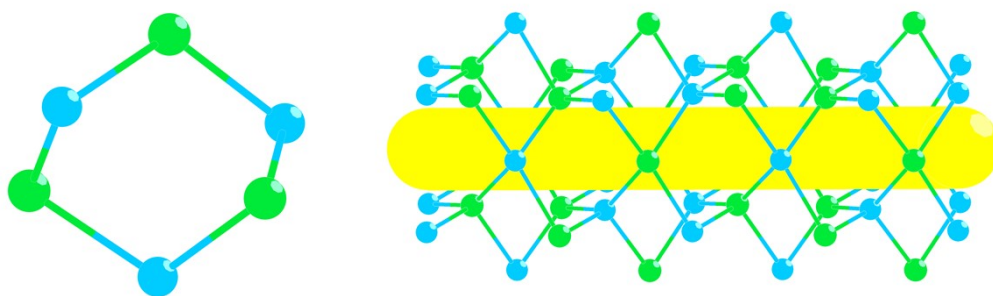

**Fig. S3** Simplified topology of  $\{\text{Na}_3\text{La}_3\}$  hexagonal ring (with sulfate units omitted) of the nanotube in  $\text{NaLa}(\text{SO}_4)_2(\text{H}_2\text{O})$ .

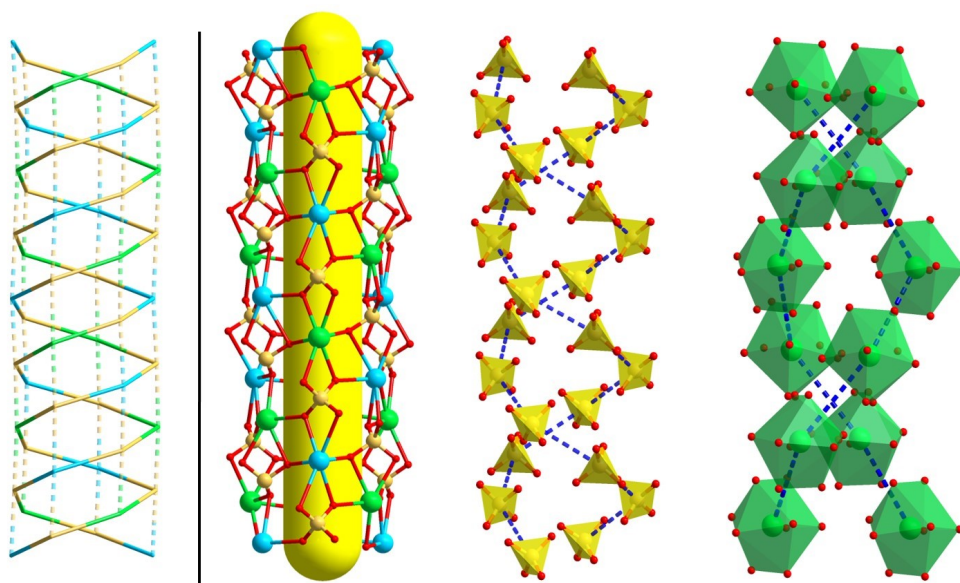

**Fig. S4** Double helix of  $-\text{La-S-Na-S}-$  on the inner wall of the nanotube and simplified topology.

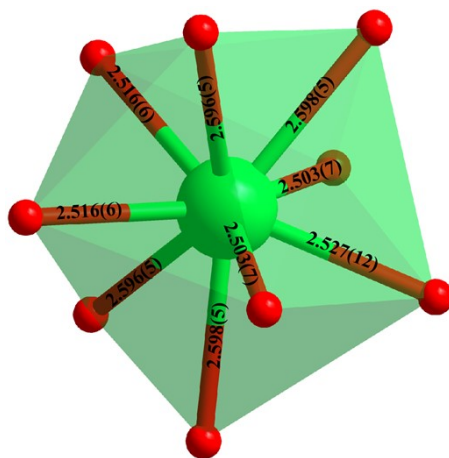

**Fig. S5**  $[\text{LaO}_9]$  polyhedron of  $\text{NaLa}(\text{SO}_4)_2(\text{H}_2\text{O})$  with bond distances.

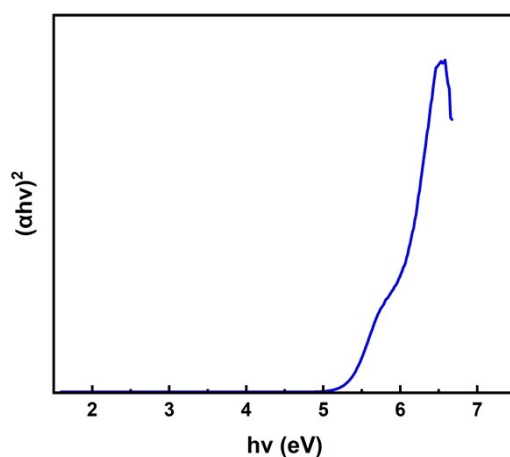

**Fig. S6** Tauc plot of  $\text{NaLa}(\text{SO}_4)_2(\text{H}_2\text{O})$ .

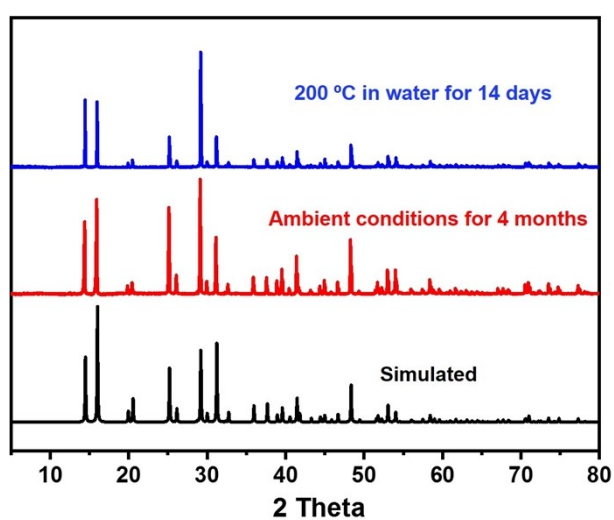

**Fig. S7** PXRD patterns of  $\text{NaLa}(\text{SO}_4)_2(\text{H}_2\text{O})$  treated under different conditions.

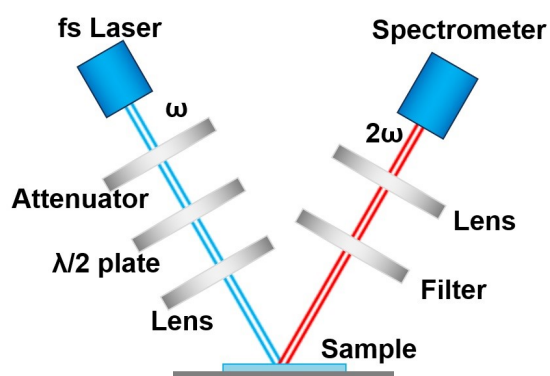

**Fig. S8** Setup for measuring the NLO properties of  $\text{NaLa}(\text{SO}_4)_2(\text{H}_2\text{O})$ .

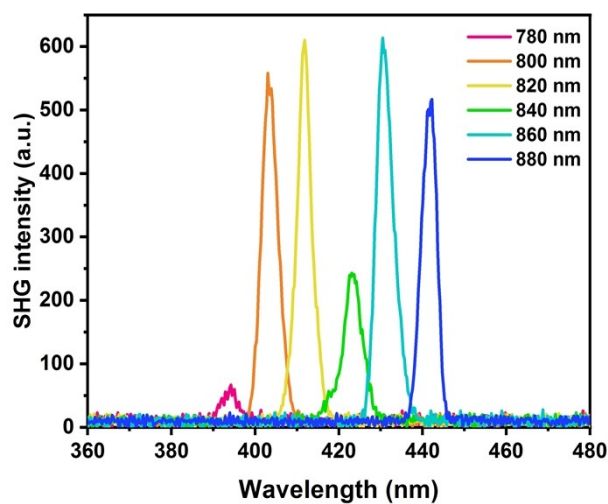

**Fig. S9** SHG intensity of  $\text{NaLa}(\text{SO}_4)_2(\text{H}_2\text{O})$  crystal pumped at various wavelengths.

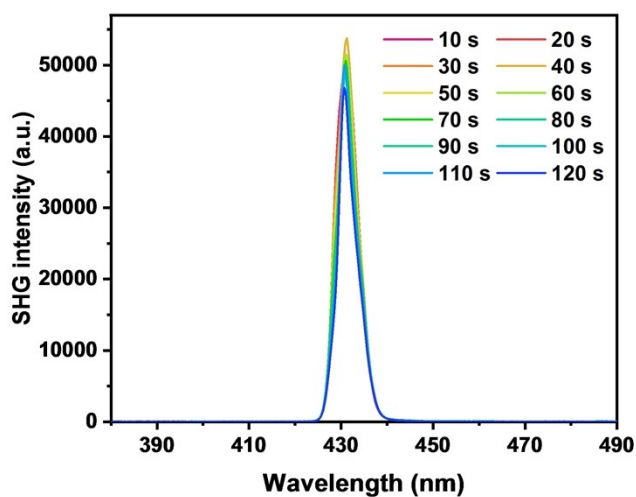

**Fig. S10** SHG intensity of  $\text{NaLa}(\text{SO}_4)_2(\text{H}_2\text{O})$  crystal pumped at 860 nm for different time intervals with a excitation power of 150 mW.

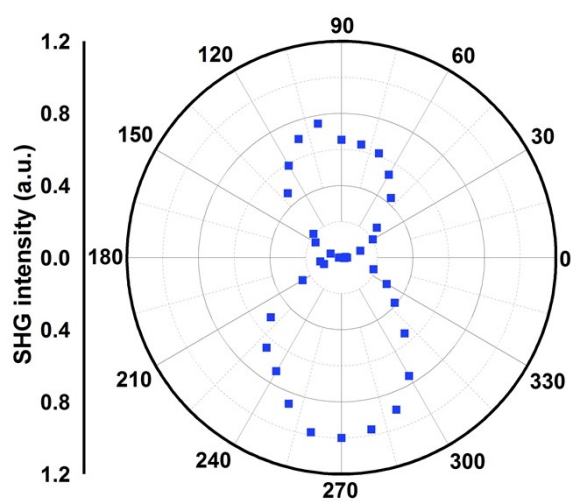

**Fig. S11** Polar SHG intensity plots of  $\text{NaLa}(\text{SO}_4)_2(\text{H}_2\text{O})$  crystal as a function of the rotation angle of the linear polarizer.

**Table S2** Fractional atomic coordinates ( $\times 10^4$ ) and equivalent isotropic displacement parameters ( $\text{\AA}^2 \times 10^3$ ) for NaLa(SO<sub>4</sub>)<sub>2</sub>(H<sub>2</sub>O).

| Atom | <i>x</i> | <i>y</i>    | <i>z</i>   | U(eq)     |
|------|----------|-------------|------------|-----------|
| La01 | 0        | -4325.8(10) | 3333       | 11.01(18) |
| S002 | 5600(3)  | 128(3)      | 4199.5(11) | 11.5(4)   |
| Na03 | 4697(7)  | 4697(7)     | 5000       | 23.2(10)  |
| O004 | 3826(10) | -1178(12)   | 3476(4)    | 18.7(15)  |
| O005 | 6099(9)  | -1288(9)    | 4846(4)    | 18.0(13)  |
| O006 | 4965(10) | 1345(10)    | 4922(4)    | 17.4(14)  |
| O007 | 7539(8)  | 1627(9)     | 3593(4)    | 18.2(14)  |
| O008 | 0        | -746(16)    | 3333       | 57(5)     |

**Table S3** Anisotropic displacement parameters ( $\text{\AA}^2 \times 10^3$ ) for NaLa(SO<sub>4</sub>)<sub>2</sub>(H<sub>2</sub>O).

| Atom | U <sub>11</sub> | U <sub>22</sub> | U <sub>33</sub> | U <sub>23</sub> | U <sub>13</sub> | U <sub>12</sub> |
|------|-----------------|-----------------|-----------------|-----------------|-----------------|-----------------|
| La01 | 9.9(4)          | 11.5(3)         | 11.1(3)         | 0.04(14)        | 0.1(3)          | 4.9(2)          |
| S002 | 12.1(9)         | 10.1(10)        | 10.2(8)         | -0.1(8)         | -0.3(7)         | 3.9(7)          |
| Na03 | 27(2)           | 27(2)           | 21(2)           | -2.8(11)        | 2.8(11)         | 18(3)           |
| O004 | 15(3)           | 17(4)           | 15(3)           | 1(3)            | -4(2)           | 2(3)            |
| O005 | 23(4)           | 16(3)           | 17(3)           | 5(2)            | 2(2)            | 11(3)           |
| O006 | 23(4)           | 21(3)           | 13(3)           | -1(2)           | -1(2)           | 15(3)           |
| O007 | 11(3)           | 18(3)           | 20(3)           | 3(2)            | 5(2)            | 3(2)            |
| O008 | 37(9)           | 24(5)           | 115(11)         | 12(3)           | 24(7)           | 18(5)           |

**Table S4** Bond lengths for NaLa(SO<sub>4</sub>)<sub>2</sub>(H<sub>2</sub>O)<sup>[a]</sup>.

| Atom | Atom              | Length/Å  | Atom | Atom               | Length/Å |
|------|-------------------|-----------|------|--------------------|----------|
| La01 | O004              | 2.503(7)  | S002 | O006               | 1.483(6) |
| La01 | O004 <sup>4</sup> | 2.503(7)  | S002 | O007               | 1.471(5) |
| La01 | O005 <sup>2</sup> | 2.598(5)  | Na03 | O004 <sup>9</sup>  | 2.530(5) |
| La01 | O005 <sup>1</sup> | 2.598(5)  | Na03 | O004 <sup>10</sup> | 2.530(5) |
| La01 | O006 <sup>1</sup> | 2.596(5)  | Na03 | O005 <sup>11</sup> | 2.499(7) |
| La01 | O006 <sup>2</sup> | 2.596(5)  | Na03 | O005 <sup>12</sup> | 2.499(7) |
| La01 | O007 <sup>5</sup> | 2.516(6)  | Na03 | O006               | 2.469(6) |
| La01 | O007 <sup>6</sup> | 2.516(6)  | Na03 | O006 <sup>13</sup> | 2.469(6) |
| La01 | O008              | 2.527(12) | Na03 | O007 <sup>9</sup>  | 2.868(6) |
| S002 | O004              | 1.464(6)  | Na03 | O007 <sup>10</sup> | 2.868(6) |
| S002 | O005              | 1.476(5)  |      |                    |          |

<sup>[a]</sup>Symmetry codes for NaLa(SO<sub>4</sub>)<sub>2</sub>(H<sub>2</sub>O): (1) y, x-1, -z+1; (2) -y, x-y-1, z-1/3; (3) -y+1, x-y, z-1/3; (4) -x, -x+y, -z+2/3; (5) x-1, y-1, z; (6) -x+1, -x+y, -z+2/3; (7) -x+y+1, -x, z+1/3; (8) x+1, y+1, z; (9) -x+y+1, -x+1, z+1/3; (10) -x+1, -x+y+1, -z+2/3; (11) x, y+1, z; (12) y+1, x, -z+1; (13) y, x, -z+1.

**Table S5** Bond angles for NaLa(SO<sub>4</sub>)<sub>2</sub>(H<sub>2</sub>O).

| Atom Atom Atom                           | Angle/°    | Atom Atom Atom                             | Angle/°    |
|------------------------------------------|------------|--------------------------------------------|------------|
| O004 <sup>4</sup> La01 O004              | 139.3(3)   | O008 La01 O005 <sup>1</sup>                | 73.12(12)  |
| O004 <sup>4</sup> La01 O005 <sup>2</sup> | 71.48(17)  | O008 La01 O005 <sup>2</sup>                | 73.12(12)  |
| O004 <sup>4</sup> La01 O005 <sup>1</sup> | 96.63(18)  | O008 La01 O006 <sup>1</sup>                | 112.07(13) |
| O004 La01 O005 <sup>2</sup>              | 96.63(18)  | O008 La01 O006 <sup>2</sup>                | 112.07(13) |
| O004 La01 O005 <sup>1</sup>              | 71.48(17)  | O004 <sup>8</sup> Na03 O004 <sup>10</sup>  | 151.3(4)   |
| O004 La01 O006 <sup>2</sup>              | 76.74(19)  | O004 <sup>10</sup> Na03 O007 <sup>10</sup> | 51.67(17)  |
| O004 La01 O006 <sup>1</sup>              | 119.41(18) | O004 <sup>10</sup> Na03 O007 <sup>8</sup>  | 142.5(2)   |
| O004 <sup>4</sup> La01 O006 <sup>2</sup> | 119.41(18) | O004 <sup>8</sup> Na03 O007 <sup>10</sup>  | 142.5(2)   |
| O004 <sup>4</sup> La01 O006 <sup>1</sup> | 76.74(19)  | O004 <sup>8</sup> Na03 O007 <sup>8</sup>   | 51.67(17)  |
| O004 <sup>4</sup> La01 O007 <sup>5</sup> | 145.5(2)   | O005 <sup>11</sup> Na03 O004 <sup>10</sup> | 72.7(2)    |
| O004 <sup>4</sup> La01 O007 <sup>6</sup> | 74.1(2)    | O005 <sup>11</sup> Na03 O004 <sup>8</sup>  | 85.3(2)    |
| O004 La01 O007 <sup>6</sup>              | 145.5(2)   | O005 <sup>12</sup> Na03 O004 <sup>8</sup>  | 72.7(2)    |
| O004 La01 O007 <sup>5</sup>              | 74.1(2)    | O005 <sup>12</sup> Na03 O004 <sup>10</sup> | 85.3(2)    |
| O004 <sup>4</sup> La01 O008              | 69.63(17)  | O005 <sup>11</sup> Na03 O005 <sup>12</sup> | 80.2(3)    |
| O004 La01 O008                           | 69.63(17)  | O005 <sup>12</sup> Na03 O007 <sup>10</sup> | 88.67(17)  |
| O005 <sup>1</sup> La01 O005 <sup>2</sup> | 146.2(2)   | O005 <sup>11</sup> Na03 O007 <sup>8</sup>  | 88.67(17)  |
| O006 <sup>2</sup> La01 O005 <sup>1</sup> | 143.46(17) | O005 <sup>11</sup> Na03 O007 <sup>10</sup> | 123.99(17) |
| O006 <sup>1</sup> La01 O005 <sup>1</sup> | 54.18(17)  | O005 <sup>12</sup> Na03 O007 <sup>8</sup>  | 123.99(17) |
| O006 <sup>1</sup> La01 O005 <sup>2</sup> | 143.46(17) | O006 <sup>13</sup> Na03 O004 <sup>10</sup> | 113.74(18) |
| O006 <sup>2</sup> La01 O005 <sup>2</sup> | 54.18(17)  | O006 <sup>13</sup> Na03 O004 <sup>8</sup>  | 79.4(2)    |
| O006 <sup>1</sup> La01 O006 <sup>2</sup> | 135.9(3)   | O006 Na03 O004 <sup>8</sup>                | 113.74(18) |
| O007 <sup>5</sup> La01 O005 <sup>1</sup> | 85.81(17)  | O006 Na03 O004 <sup>10</sup>               | 79.4(2)    |
| O007 <sup>5</sup> La01 O005 <sup>2</sup> | 122.14(17) | O006 <sup>13</sup> Na03 O005 <sup>12</sup> | 76.55(17)  |
| O007 <sup>6</sup> La01 O005 <sup>1</sup> | 122.14(17) | O006 Na03 O005 <sup>11</sup>               | 76.55(17)  |
| O007 <sup>6</sup> La01 O005 <sup>2</sup> | 85.81(17)  | O006 <sup>13</sup> Na03 O005 <sup>11</sup> | 155.1(3)   |
| O007 <sup>5</sup> La01 O006 <sup>1</sup> | 77.07(18)  | O006 Na03 O005 <sup>12</sup>               | 155.1(3)   |
| O007 <sup>6</sup> La01 O006 <sup>1</sup> | 68.28(17)  | O006 Na03 O006 <sup>13</sup>               | 127.7(4)   |
| O007 <sup>6</sup> La01 O006 <sup>2</sup> | 77.07(18)  | O006 Na03 O007 <sup>10</sup>               | 96.9(2)    |
| O007 <sup>5</sup> La01 O006 <sup>2</sup> | 68.28(17)  | O006 <sup>13</sup> Na03 O007 <sup>10</sup> | 64.55(16)  |
| O007 <sup>5</sup> La01 O007 <sup>6</sup> | 75.6(2)    | O006 Na03 O007 <sup>8</sup>                | 64.55(16)  |
| O007 <sup>6</sup> La01 O008              | 142.22(12) | O006 <sup>13</sup> Na03 O007 <sup>8</sup>  | 96.9(2)    |
| O007 <sup>5</sup> La01 O008              | 142.22(12) | O007 <sup>10</sup> Na03 O007 <sup>8</sup>  | 139.0(3)   |

### 3. References

- [1] O. V. Dolomanov, L. J. Bourhis, R. J. Gildea, J. A. K. Howard and H. Puschmann, OLEX2: a complete structure solution, refinement and analysis program, *J. Appl. Cryst.*, **2009**, *42*, 339-341.
- [2] S. J. Clark, M. D. Segall, C. J. Pickard, P. J. Hasnip, M. I. J. Probert, K. Refson and M. C. Payne, First principles methods using CASTEP, *Z. Kristallogr.*, **2005**, *220*, 567-570.
- [3] J. Lin, M.-H. Lee, Z.-P. Liu, C. Chen and C. J. Pickard, Mechanism for linear and nonlinear optical effects in  $\beta$ -BaB<sub>2</sub>O<sub>4</sub> crystals, *Phy. Rev. B*, **1999**, *60*, 13380-13389.
- [4] Z. Guo, J. Li, J. Liang, C. Wang, X. Zhu and T. He, Regulating optical activity and anisotropic second-harmonic generation in zero-dimensional hybrid copper halides, *Nano Lett.*, **2022**, *22*, 846-852.
- [5] P. Cheng, X. Jia, S. Chai, G. Li, M. Xin, J. Guan, X. Han, W. Han, S. Zeng, Y. Zheng, J. Xu and X.-H. Bu, Boosted second harmonic generation of a chiral hybrid lead halide resonant to charge transfer exciton from metal halide octahedra to ligand, *Angew. Chem., Int. Ed.*, **2024**, *63*, e202400644.
- [6] B. Li, Y.-X. Meng, Q.-Q. Liu, X.-Y. Chen, X. Liu and H.-Y. Zang, The assembly of [Mo<sub>2</sub>O<sub>2</sub>S<sub>2</sub>]<sup>2+</sup> based on polydentate phosphonate templates and their proton conductivity, *Chem. Commun.*, **2023**, *59*, 13446-13449.
- [7] W.-B. Ren, S. Sun, Z. Gao, B. Li, X. Chen, Q. Liu and H.-Y. Zang, Synthesis of phosphovanadate-based porous inorganic frameworks with high proton conductivity, *Inorg. Chem.*, **2023**, *62*, 20506-20512.
